# Supplementary material
Source: publisher site journal article supplement (https://www.dovepress.com/article/502658)
Supplement: Supplementary file 1 [file get_supplementary_file.php]

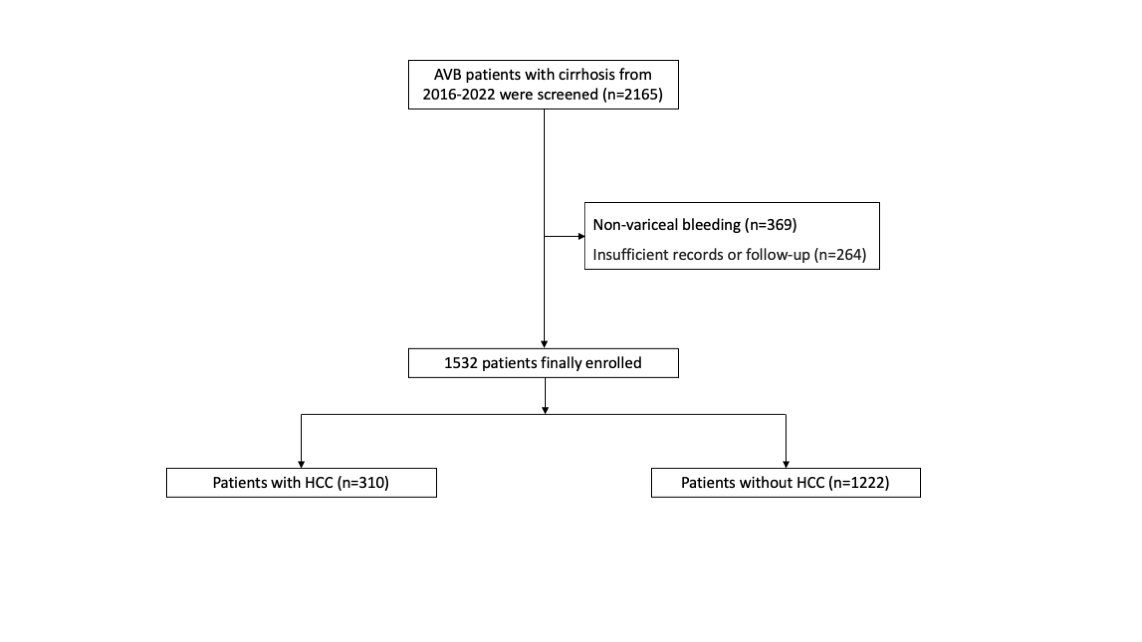


Figure S1. Flowchart of patient enrollment. AVB, acute variceal bleeding; HCC, hepatocellular carcinoma.


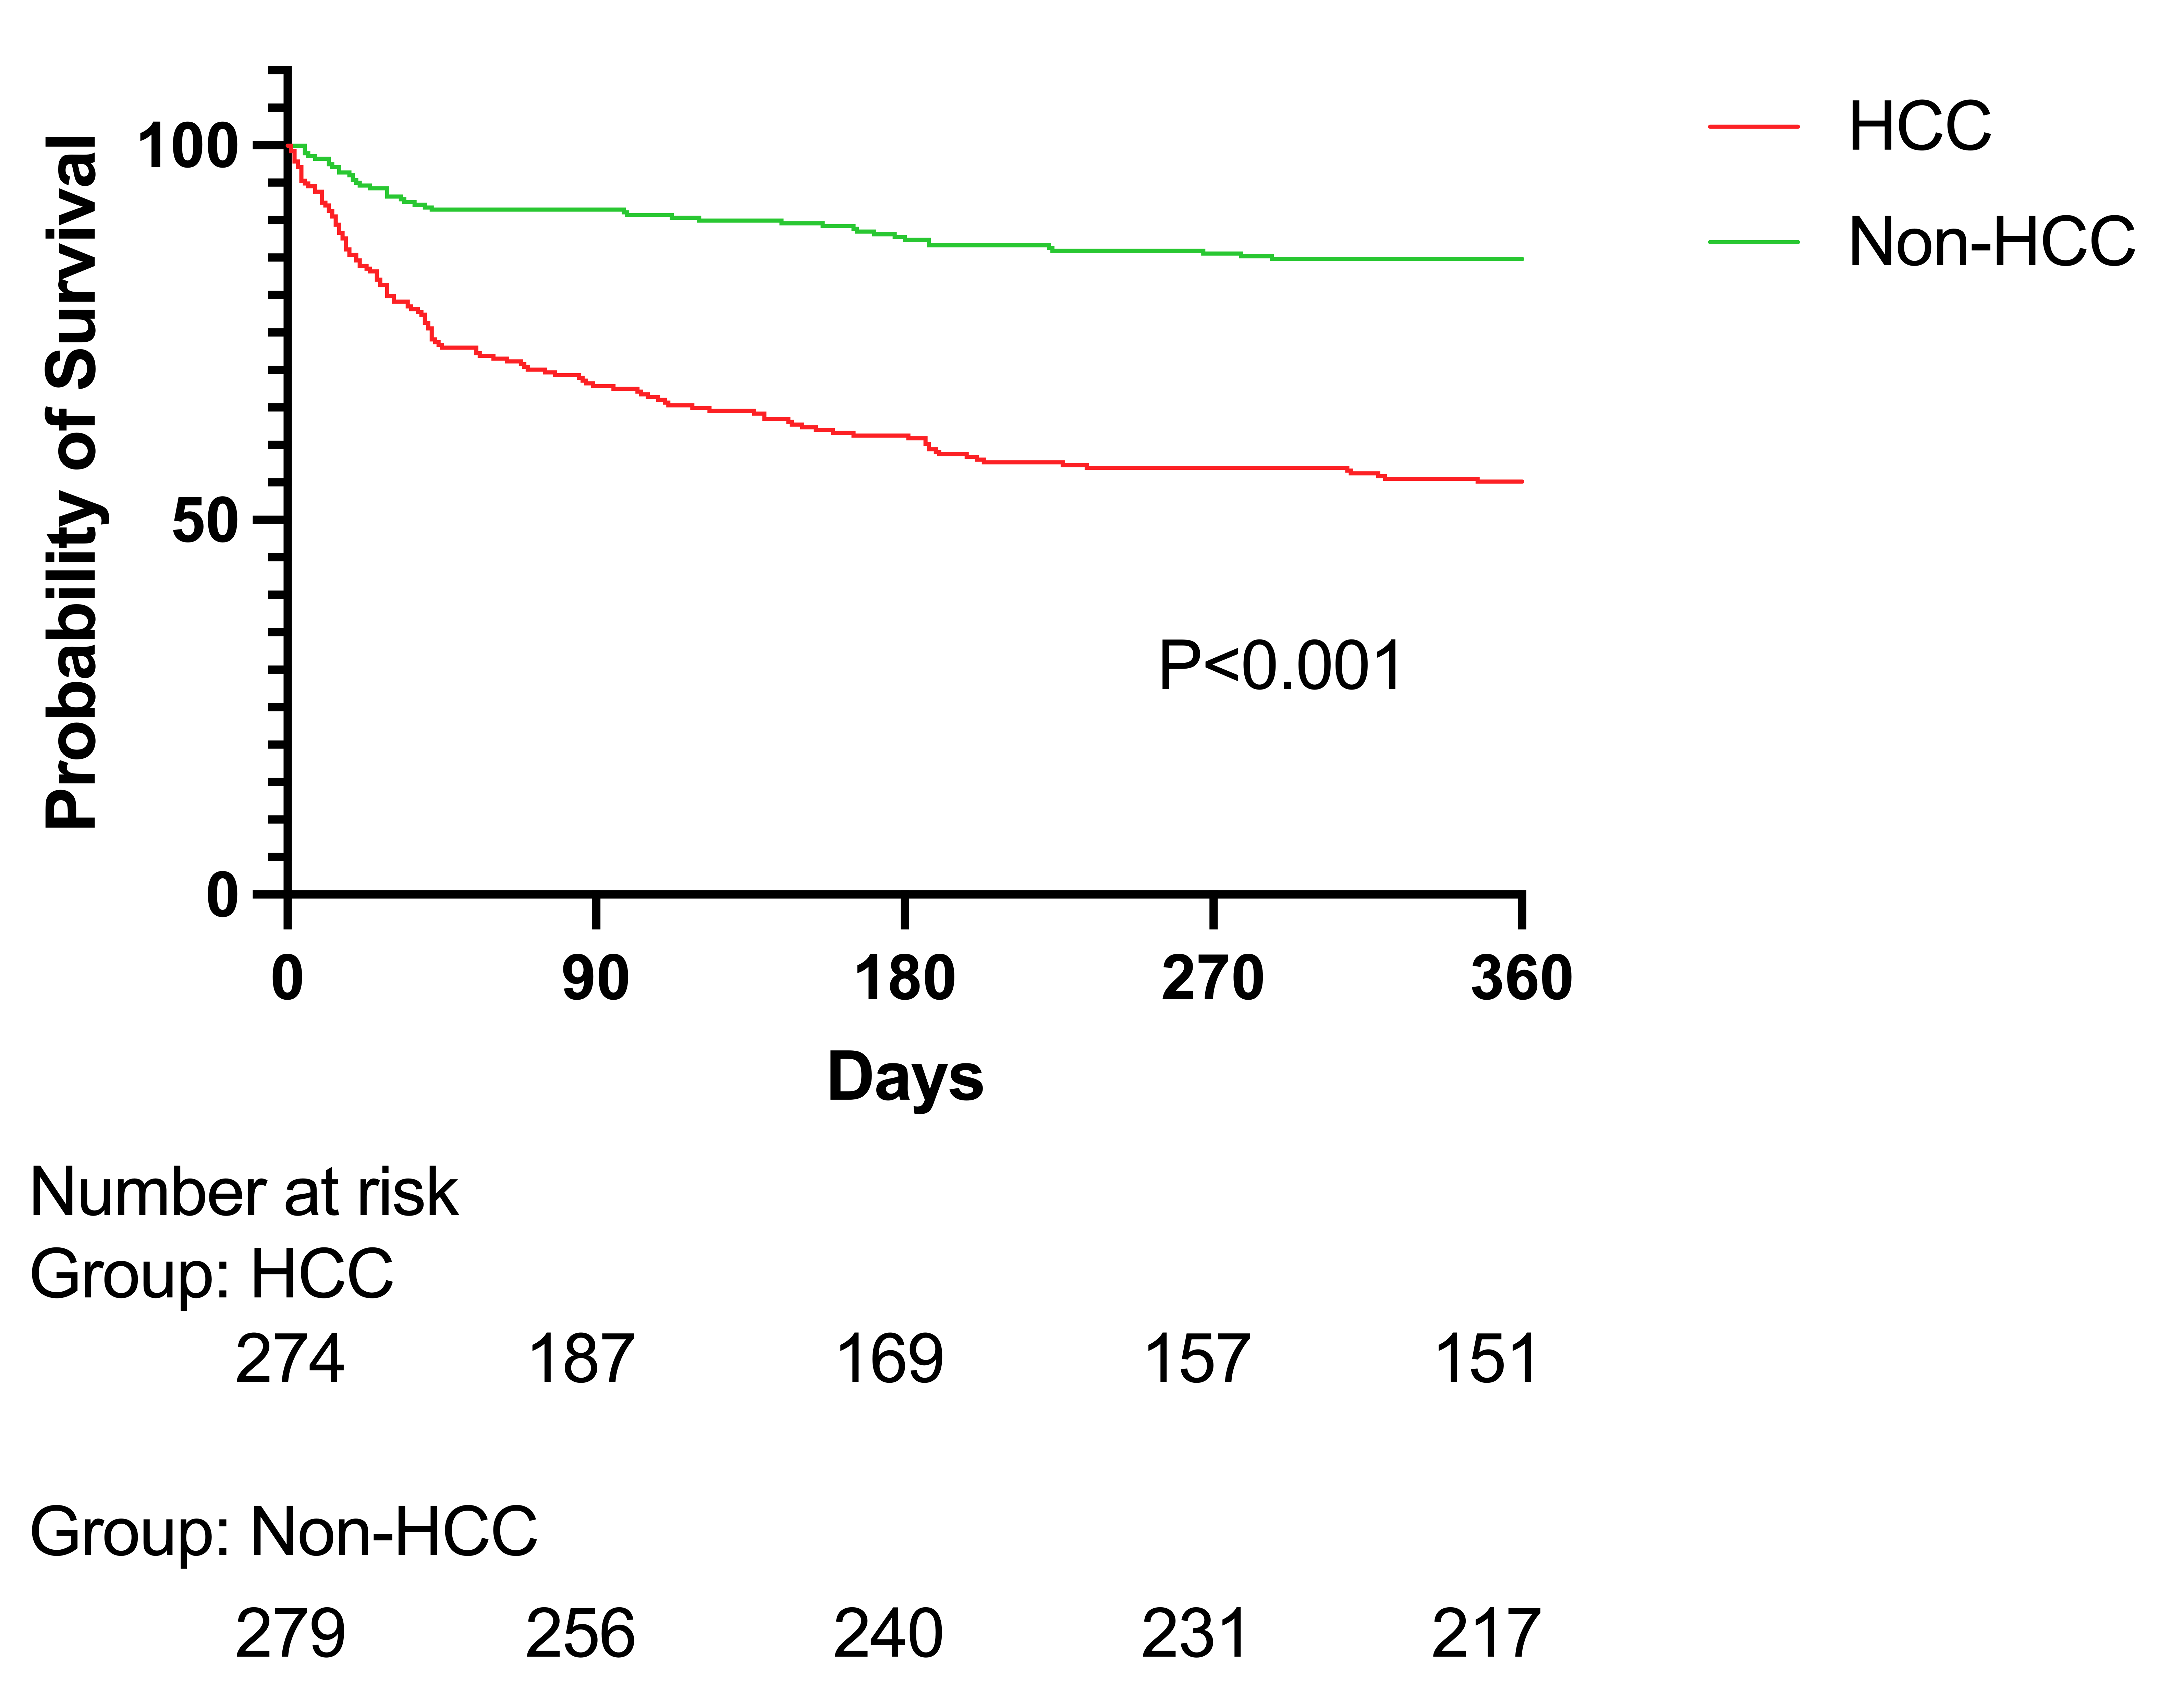


Figure S2. Cumulative survival rates at 1 year according to the presence of HCC. AVB patients with HCC had higher 1-year mortality than patients without. AVB, acute variceal bleeding; HCC, hepatocellular carcinoma.

Table S1. Baseline characteristics.

|  | all | HCC (n=310) | Non-HCC (n=1222) | P |
| --- | --- | --- | --- | --- |
| Age (years) | 54 (46-63) | 54 (46-63) | 53 (47-63) | 0.766 |
| Sex, male | 1060 (69.2) | 270 (87.1) | 790 (64.4) | <0.001 |
| Etiology |  |  |  | <0.001 |
| Viral | 896 (58.5) | 247 (79.7) | 649 (53.1) |  |
| Alcohol | 197 (12.9) | 22 (7.1) | 175 (14.3) |  |
| Viral + Alcohol | 91 (5.9) | 21 (6.8) | 70 (5.7) |  |
| Others | 348 (22.7) | 20 (6.5) | 328 (26.8) |  |
| Previous VB | 630 (41.1) | 109 (35.2) | 521 (42.6) | 0.017 |
| PVT | 439 (28.7) | 175 (56.5) | 264 (21.6) | <0.001 |
| Child-Pugh score | 8 (7-9) | 8 (7-9) | 8 (7-9) | 0.020 |
| Child-Pugh class |  |  |  | <0.001 |
| A | 337 (22.0) | 42 (13.5) | 295 (24.1) |  |
| B | 856 (55.9) | 198 (63.9) | 658 (53.8) |  |
| C | 339 (22.1) | 70 (22.6) | 269 (22.0) |  |
| MELD score | 11 (9-15) | 12 (10-14) | 11 (9-15) | 0.281 |
| Infection | 548 (35.8) | 131 (42.3) | 417 (34.1) | 0.008 |
| HE | 158 (10.3) | 37 (11.9) | 121 (9.9) | 0.028 |
| Ascites |  |  |  | <0.001 |
| None | 410 (26.8) | 58 (18.7) | 352 (28.8) |  |
| Mild | 526 (34.3) | 89 (28.7) | 437 (35.8) |  |
| Severe | 596 (38.9) | 163 (52.6) | 433 (35.4) |  |
| Hematemesis at the initial presentation | 1120 (73.1) | 226 (72.9) | 894 (73.2) | 0.928 |
| Heart rate | 91 (79-104) | 94 (80-108) | 91 (78-104) | 0.013 |
| Initial systolic blood pressure | 110 (98-123) | 112 (100-125) | 110 (98-123) | 0.300 |
| Source of bleeding |  |  |  | 0.829 |
| EV | 906 (59.1) | 185 (59.7) | 721 (59.0) |  |
| GV | 626 (40.9) | 125 (40.3) | 501 (41.0) |  |
| BCLC 0/A/B/C/D (%) | - | 21/66/68/108/47 (6.8/21.3/21.9/34.8/15.2) | - |  |
| Laboratory variables |  |  |  |  |
| Hemoglobin (g/L) | 75 (62-90) | 77 (65-92) | 74 (62-90) | 0.028 |
| Platelet count (×109/L) | 72 (46-108) | 89 (59-132) | 68 (44-99) | <0.001 |
| WBC count (×109/L) | 5.74 (3.79-9.00) | 6.19 (4.16-9.36) | 5.64 (3.73-8.88) | 0.040 |
| Total bilirubin (umol/L) | 23.3 (15.7-37.1) | 23.6 (16.5-40.9) | 23.0 (15.4-36.5) | 0.293 |
| Albumin (g/L) | 30.8 (27.1-34.4) | 30.3 (26.9-34.1) | 30.9 (27.1-34.7) | 0.078 |
| INR | 1.31 (1.20-1.50) | 1.31 (1.20-1.49) | 1.30 (1.20-1.50) | 0.366 |
| Cr (umol/L) | 70 (57-86) | 74 (61-90) | 69 (57-84) | 0.420 |

**Note:** Data are presented as median (interquartile range) or number (%).

**Abbreviations:** BCLC, Barcelona Clinic Liver Cancer; Cr, creatinine; EV, esophageal varices; GV, gastric varices; HCC, hepatocellular carcinoma; HE, hepatic encephalopathy; INR, international normalized ratio; MELD, the model for end-stage liver disease; PVT, portal vein thrombosis; VB, variceal bleeding; WBC, white blood cells.

Table S2. Independent risk factors for 5-day treatment failure in HCC patients with AVB

| Variable | Univariate |  | Multivariate |  |
| --- | --- | --- | --- | --- |
|  | HR (95% CI) | p-value | HR (95% CI) | p-value |
| Shock index | 22.708 (6.815-75.665) | <0.001 | 20.598 (6.092-69.653) | <0.001 |
| Infection | 1.673 (0.966-2.900) | 0.067 |  |  |
| BCLC class (C-D vs 0-B) | 2.133 (1.210-3.761) | 0.009 |  |  |
| Blood transfusion | 2.548 (1.401-4.634) | 0.002 |  |  |
| Child-Pugh score | 1.273 (1.106-1.465) | <0.001 | 1.229 (1.055-1.433) | 0.008 |

AVB, acute variceal bleeding; BCLC, Barcelona Clinic Liver Cancer. HCC, hepatocellular carcinoma;

Table S3. Independent risk factors for 1-year mortality in HCC patients with AVB

| Variable | Univariate |  | Multivariate |  |
| --- | --- | --- | --- | --- |
|  | HR (95% CI) | p-value | HR (95% CI) | p-value |
| BCLC class (C-D vs 0-B) | 6.068 (3.878-9.495) | <0.001 | 5.192 (3.293-8.184) | <0.001 |
| PVT | 1.913 (1.315-2.783) | <0.001 |  |  |
| Infection | 1.378 (0.974-1.951) | 0.070 |  |  |
| MELD score | 1.062 (1.019-1.106) | 0.004 |  |  |
| Child-Pugh score | 1.315 (1.215-1.425) | <0.001 | 1.219 (1.125-1.321) | <0.001 |

AVB, acute variceal bleeding; BCLC, Barcelona Clinic Liver Cancer; HCC, hepatocellular carcinoma; PVT, portal vein thrombosis; MELD, the model for end-stage liver disease. Variables included in MELD score were not included in the multivariate analysis to avoid colinearity.
